# Supplementary material
Source: PubMed Central journal article supplement (PMC5821212)
Supplement: jciinsight-3-95882-s001.pdf [file jciinsight-3-95882-s001.pdf]

## Supplementary Figure 1

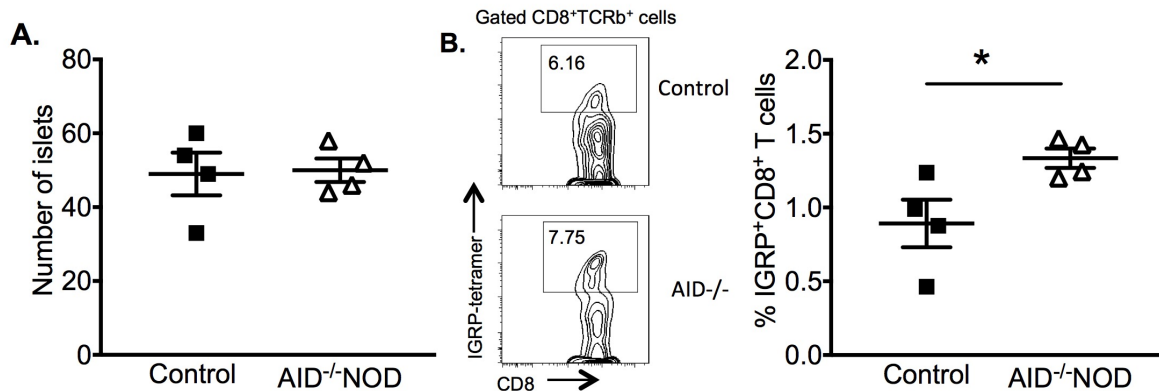

**Supplementary Figure 1. Increased IGRP-reactive CD8<sup>+</sup> T cells infiltrated islets of female AID<sup>-/-</sup>NOD mice.** Islets were hand-picked from collagenase-digested pancreata of 10-week-old female AID<sup>-/-</sup>NOD and control AID-sufficient mice and followed by cell dissociation. Immune cells were stained with anti-CD45, anti-CD8, anti-TCR $\beta$  and PE-conjugated IGRP-tetramer and subjected to flow cytometric analysis. **(A)** Total number of islets. **(B)** Percentage of IGRP<sup>+</sup>CD8<sup>+</sup> T cells in islet infiltrates. Left, Representative flow cytometric plots; Right: Summary of the percentage of IGRP<sup>+</sup>CD8<sup>+</sup> T cells. Data are presented as mean $\pm$ SEM. N=4 mice/group. \* P<0.05. Student's t test **(A)**.

## Supplementary Figure 2

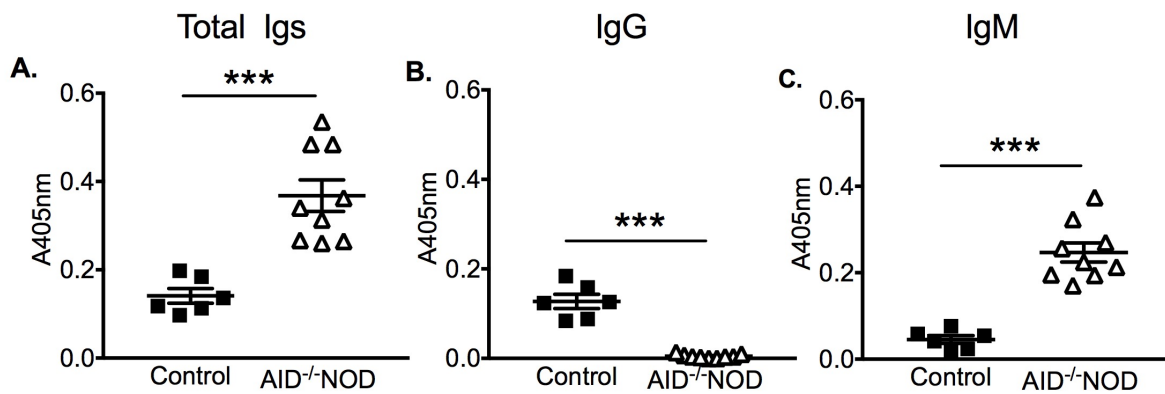

**Supplementary Figure 2. Insulin autoantibody detection.** Sera from 8-10 week-old female AID<sup>-/-</sup>NOD and control mice were used to measure insulin autoantibody by ELISA. (A) Total anti-insulin Ig (IgH+L); (B) Anti-insulin IgG and (C) Anti-insulin IgM. Data are presented as mean±SEM. N=6-9 mice/group. \*\*\* P<0.001. Student's t test (A-C).

## Supplementary Figure 3

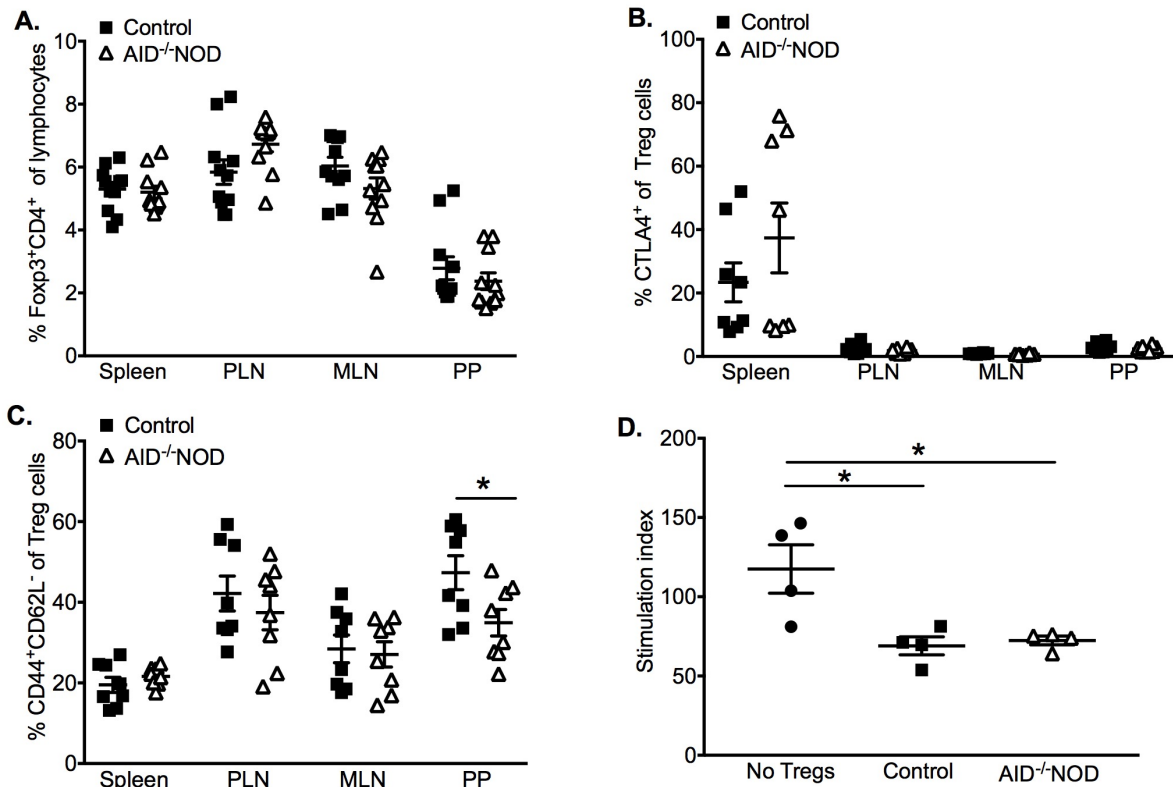

### Supplementary Figure 3. AID deficiency does not affect Treg phenotypes and functions.

Lymphocytes from spleen, PLN, MLN and PP of 8-10 week-old female AID<sup>-/-</sup>NOD and control mice were stained with fluorescence-conjugated antibodies followed by flow cytometric analysis. (A) Percentage of Tregs (Foxp3<sup>+</sup>CD4<sup>+</sup>TCRβ<sup>+</sup>) of lymphocytes. Data were pooled from three independent experiments. N=10-11 mice/group. (B) CTLA4 expression in Tregs (Foxp3<sup>+</sup>CD25<sup>+</sup>CD4<sup>+</sup>TCRβ<sup>+</sup>). (C) Percentage of CD44<sup>+</sup>CD62L<sup>-</sup> Tregs (Foxp3<sup>+</sup>CD25<sup>+</sup>CD4<sup>+</sup>TCRβ<sup>+</sup>). Data were pooled from two independent experiments and shown as mean±SEM. N=8 mice/group. (D) Treg suppression assay. Splenic regulatory T cells (CD25<sup>+</sup>CD4<sup>+</sup>) were purified with positive selection and then co-cultured with magnetic beads-purified BDC2.5 CD4<sup>+</sup> T cells plus irradiated NOD splenocytes in the absence of presence of mimotope peptide (0 or 5 ng/ml). Data was shown as stimulation index. N=4 mice/group. \* P<0.05. Student's t test (C and D).

## Supplementary Figure 4

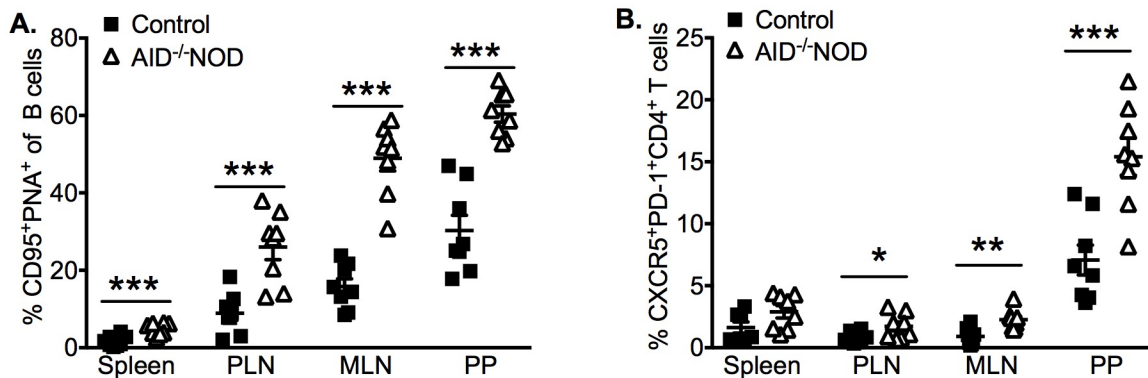

**Supplementary Figure 4. Expanded GC B cells and T<sub>FH</sub> cells in AID<sup>-/-</sup>NOD mice.** Lymphocytes from spleen, PLN, MLN and PP of 8-10 week-old female AID<sup>-/-</sup>NOD and control mice were stained with fluorescence-conjugated antibodies followed by flow cytometric analysis. **(A)** Percentage of GC B cells (PNA<sup>+</sup>CD95<sup>+</sup>) of B cells (B220<sup>+</sup>CD19<sup>+</sup>). **(B)** Percentage of T<sub>FH</sub> cells (CXCR5<sup>+</sup>PD-1<sup>+</sup>CD4<sup>+</sup>TCRβ<sup>+</sup>). Data were pooled from at least two independent experiments and shown as Mean±SEM. N=8-10 mice/group. \* P<0.05; \*\* P<0.01; \*\*\* P<0.001. Two-tailed Student's t test was used for statistical analysis.

## Supplementary Figure 5

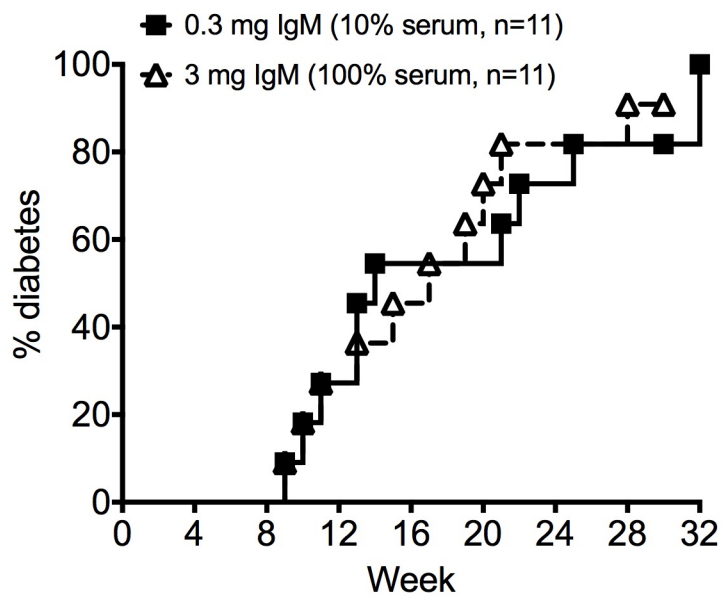

**Supplementary Figure 5.** The effect of IgM in diabetes development.  $Rag^{-/-}$ NOD mice (4-5 wks old) were infused (i.v.) with serum from AID $^{-/-}$ NOD mice at different dilutions containing either 3mg IgM or 0.3mg IgM, the day before adoptively transfer (i.v.) of purified BDC2.5  $CD4^{+}$  T cells. Mice were screened daily by testing for glycosuria. Diabetes was confirmed by blood glucose ( $\geq 250$ mg/dl) and the experiment was terminated 32 days after the T cell transfer or the time the mice developed diabetes.

## Supplementary Figure 6

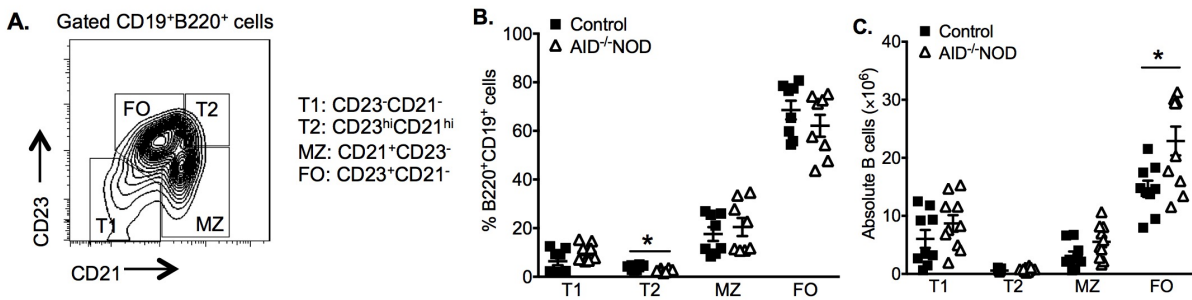

**Supplementary Figure 6. B cell subsets in the presence or absence of AID.** Splenocytes from control (AID<sup>+/+</sup> or AID<sup>+/-</sup>) and AID<sup>-/-</sup> mice (8-10 wks old, females) were harvested and stained for anti-B220, anti-CD19, anti-CD21 and anti-CD23. Gated splenic B cells (B220<sup>+</sup>CD19<sup>+</sup>) were analyzed for the expression of CD21 and CD23 to define different B cell subsets. (A) Representative gating plot. (B) Percentage of different splenic B cell subsets. (C) Absolute numbers of different splenic B cell subsets. Data were pooled from two to three independent experiments and shown as Mean±SEM. N=8-10 mice/group. \* P<0.05; \*\* P<0.01; \*\*\* P<0.001. Two-tailed Student's t test was used for statistical analysis.
